1 Analysis of Burkina Faso's institutional framework and budget allocations for  
2 NCDs control and monitoring

3 Moussa Ouedraogo<sup>1,2\*</sup>, Dia Sanou<sup>3</sup>, Mahamadé Goubgou<sup>4</sup>, Estelle Aissa Bambara<sup>2</sup>,  
4 Souleymane Tirogo<sup>2</sup>, Aly Savadogo<sup>1</sup>.

5 <sup>1</sup>Doctoral School of Sciences and Technology, Laboratory of Applied Biochemistry and  
6 Immunology (LABIA), Joseph Ki-ZERBO University, Ouagadougou, Burkina Faso

7 <sup>2</sup>Nutrition Directorate, Ministry of Health, Ouagadougou, Burkina Faso

8 <sup>3</sup>FAO, Deputy Country Representative, Bangladesh

9 <sup>4</sup>National Center for Scientific and Technological Research (CNRST)/Health Sciences  
10 Research Institute (IRSS), Burkina Faso

11 \* **Correspondence:** [edram88@yahoo.fr](mailto:edram88@yahoo.fr)

12

13 **Abstract**

14 Diet-related non-communicable diseases (NCDs) are today a major public health problem and  
15 a global development challenge. Yet governance responses to these diseases are still in their  
16 infancy in most low-income countries like Burkina Faso. How Burkina Faso organizes itself  
17 institutionally and financially to respond adequately to NCDs is unknown to the scientific  
18 community. The aim was to analyze Burkina Faso's institutional framework and budget  
19 allocations. This was a cross-sectional survey based on mixed (qualitative and quantitative) data  
20 collection. The analysis revealed a number of difficulties in the institutional framework  
21 hindering the performance of the fight against NCDs in Burkina Faso, including (i) the absence  
22 of a multi-sectoral policy or strategic plan involving all stakeholders, (ii) the absence of a multi-  
23 sectoral coordinating body and (iii) the lack of sufficient financial resources. A total of twenty-  
24 nine (29) budget lines related to the prevention and/or management of NCDs were identified,  
25 with a total budget of 17.33 billion FCFA (\$29.8 million), or an average of \$2.72 million per  
26 year. This represents only 1.55% of the total budget of the Ministry of Health over the same  
27 period. We recommend, among other things, the development of a national multi-sectoral  
28 policy with a clear definition of the roles and responsibilities of each player, the creation of a  
29 coordinating body, improved funding, and greater attention to NCDs in the provision of primary  
30 healthcare services.

31

32 **Keywords:** governance, institutional framework, financial allocation, non-communicable  
33 diseases.

34

35

36

37

38

39

40

41

42

43

44

45

## 46 1. Introduction

47 Diet-related non-communicable diseases (NCDs) are today a major public health issue and a  
48 global development challenge [1]. Also known as chronic diseases, they include obesity,  
49 cardiovascular disease, diabetes, cancer, hypertension, hyperglycemia and oral diseases [2].  
50 According to the Global Panel's experts, the health risks of chronic food-borne diseases are  
51 greater than the combined risks of tobacco, alcohol and unprotected sex [3]. NCDs account for  
52 over 50% of total premature mortality (i.e. deaths under the age of 60) in most low- and middle-  
53 income countries [4, 5]. This is compounded by insufficient budgetary allocations to the fight  
54 against NCDs over the last ten years [6]. According to the results of STEPS surveys in Burkina  
55 Faso, the prevalence of obesity (BMI>30kg/m<sup>2</sup>) rose from 11.3% in 2013 to 15.9% in 2021 in  
56 urban areas [7, 8] and WHO estimates that over 35% of deaths in Burkina Faso are due to NCDs  
57 [9]. The cost of inaction far outweighs the cost of action against non-communicable diseases,  
58 as recommended in the global action plan proposed by the WHO [10]. However, it is  
59 encouraging to note that several global initiatives have been launched to tackle the global  
60 burden of NCDs [11]. The World Health Assembly has adopted a global action plan 2013-2020  
61 on NCDs that calls for country-level capacity building, leadership, governance, multi-sectoral  
62 action and partnerships to accelerate the fight against NCDs in countries [12]. Despite  
63 international interest in the fight against NCDs, the response in most low- and middle-income  
64 countries is still in its infancy [13, 14]. Yet with the rapid socio-economic transitions taking  
65 place in sub-Saharan Africa, if nothing is done, there is a risk that the growing prevalence of  
66 NCDs will overwhelm already struggling health services, with adverse consequences for  
67 individuals and economies [2, 15]. WHO estimates that NCDs will be the leading cause of death  
68 in sub-Saharan Africa by 2030 [16]. Ouedraogo et al. showed that many concerns about the  
69 governance of NCDs remain unresolved in most ECOWAS countries, namely the question of  
70 institutional arrangements and funding for NCD control [14]. The aim was to analyze Burkina  
71 Faso's institutional framework and budget allocations for NCD control.

## 72 2. Methodology

73 The theoretical approach is based on Ground Theory (GT) [17]. GT proposes an approach that  
74 favors analysis in data from several sources, in order to triangulate the information collected.  
75 The central principle in data analysis is the constant return to comparison between the products  
76 of analysis and empirical data [17]. On the one hand, it was a cross-sectional study based on  
77 the mixed (quantitative and qualitative) data collection proposed by Halcomb et al.[18] with  
78 key informants, combined with a literature review and an analysis of budget allocations for the  
79 fight against NCDs. This second part is based on the methodological approach developed by  
80 the Scaling Up Nutrition Movement [19], adapted by UNICEF [20]. This methodology,  
81 developed for the purpose of monitoring investments in nutrition, has been adapted to NCDs  
82 within the framework of this study. Only the budget allocations of the Ministry of Health were  
83 analyzed, due to the difficulty of obtaining accurate data on funding from technical and  
84 financial partners. The budget lines taken into account in this second phase are those linked to  
85 the prevention and control of NCDs.

### 86 2.1. Target population

87 The survey mainly involved resource persons from the Ministry of Health, identified on the  
88 basis of a review of the 2016-2020 integrated strategic plan to combat NCDs (PILMNT) [21].  
89 These people have been identified on the basis of the involvement of the structure for which  
90 they are responsible in implementing the plan.

91 The document review consisted in examining reference documents (policies, strategic plans and  
92 programs) relating to NCDs in order to triangulate information. A total of 20 interviews were  
93 conducted with (15) technical structures of the Ministry of Health and Public Hygiene and five

94 (5) NGOs/Associations working in the health sector. Interviewees had to (i) be in charge of  
95 their structure (or have been designated by the person in charge), (ii) have given informed  
96 consent to take part in the study, and (iii) have been involved in the project.

## 97 2.2. Tool and data collection

98 A semi-structured questionnaire built around the components of NTM governance proposed by  
99 Ouedraogo et al. notably (i) involvement in the elaboration of reference documents, notably the  
100 PILMNT, (ii) multi-sectoral collaboration, (iii) availability of a common results framework,  
101 (iv) existence of a consultation framework, (v) availability of sufficient resources for the  
102 implementation of national interventions. Interviews were recorded with a Dictaphone and  
103 partially transcribed for analysis purposes. Data collection took place from January to March  
104 2023.

105 With regard to budget tracking, the analysis focused on the final allocations and expenditures  
106 of the Burkina Faso Ministry of Health over the period 2010 to 2020. These data were retrieved  
107 from the Integrated Expenditure Circuit (CID) platform of the Ministry of Economy, Finance  
108 and Development (MINEFID). The platform groups together all operations containing  
109 allocations and expenditures, as well as transfers made by the government to local authorities  
110 and other public establishments. At the request of the research team, data from 2010 to 2020  
111 were extracted from the CID by a MINEFID agent, containing allocations and expenditures,  
112 and then made available to the authors for the various analyses. The authors then carried out a  
113 detailed examination of the Ministry of Health's budget to extract the budget lines relating to  
114 NCDs.

115 Certain budget lines have not been taken into account in line with the SUN approach used.  
116 Indeed, the methodology suggests that budget lines should not be included in the analysis when  
117 they concern:

- 118 • the payment of civil servants' salaries;
- 119 • the operation of general and technical services; hospitals, health districts, training  
120 establishments, etc;
- 121 • the organization of examinations and competitions;
- 122 • operating and project expenditure.

123 The research team then analyzed the budget lines selected during the data collection phase in  
124 order to categorize and weight them. Categorization made it possible to classify the selected  
125 budget lines into 3 categories: specific, sensitive and positive (Figure 1). The validated budget  
126 lines were then weighted. This involved assigning a rate to each line according to its estimated  
127 level of contribution to the prevention and control of NCDs in the country. This rate was  
128 determined by the authors on the basis of the available scientific evidence, the current state of  
129 the intervention implemented in the country, the context of NCDs at national and international  
130 level, and finally on the basis of the interventions proposed in the Action Plan for the Prevention  
131 and Control of Non-Communicable Diseases 2013-2020 [10, 22]. Budget lines considered  
132 specific to NTMs were given a weighting of 100%. As for those classified as sensitive to NTMs,  
133 three levels of weighting were applied according to the estimated degree of sensitivity of the  
134 investments, i.e. 10%, 25% and 50% for low, medium and high sensitivity investments  
135 respectively. Favorable investments were not included in total NTM expenditure.  
136 Consequently, a zero rate has been applied to these lines.

137 Figure 1: Conceptual framework for categorizing pro-NCD budget lines adapted from the  
138 conceptual framework for categorizing pro-Nutrition budget lines.

139           2.3.           Ethical consideration

140   The study was approved by the Ethics Committee for Health Research (CERS) based in  
141   Ouagadougou, Burkina Faso in its deliberation no. 2021-03-049 2021. All participants  
142   interviewed as part of this study were interviewed after giving their verbal consent.

143           2.4.           Data processing and analysis

144   An analysis matrix was designed, then filled in from the various transcripts. The matrix was  
145   then analyzed by thematic group. This analysis concerns only actors from the Ministry of  
146   Health. The level of collaboration was assessed primarily on the basis of participants'  
147   statements. Verbatims were used to support the analyses.

148   For the analysis of budget allocations, the database obtained at the end of the various stages  
149   was processed using Stata 12 software. The data were then subjected to descriptive analysis and  
150   calculations of budget allocation frequencies. Trends in budget allocations were examined over  
151   time. Observed differences were evaluated using Student's t-test, with a significance level of  
152   5% and a confidence interval of 95%.

153           3.       Results

154           3.1.       Institutional arrangements

155   The literature review, and in particular an examination of the organizational chart of the  
156   Ministry of Health and Public Hygiene, shows that Burkina Faso has set up a Department for  
157   the Prevention and Control of Non-Communicable Diseases (DPCM) within the General  
158   Directorate of Health and Public Hygiene, to better coordinate all NCD control programs and  
159   pool energies at national, sub-regional and international levels (Figure 2). Alongside this  
160   technical department, there are other departments whose missions directly or indirectly include  
161   the fight against NCDs. This is the case of the Nutrition Directorate, for example, which  
162   implements the multisectoral National Nutrition Policy 2020 - 2029, one of whose major  
163   strategic axes is “Strengthening the fight against overnutrition and nutrition-related chronic  
164   non-transmissible diseases” (Strategic Axis III) [23]. Although these structures report to the  
165   same general management, they seem to function mainly as technical units, rather than as  
166   specific program management and implementation entities. Indeed, it emerged from the various  
167   interviews that each structure had its own action plan and annual work plan, and that the  
168   preparation of these documents was in most cases carried out in a compartmentalized manner.  
169   “..... *If not, as long as each department works in isolation from the other, it will be difficult to*  
170   *achieve the expected results, as each department will pursue its own agenda rather than the*  
171   *common agenda of the general management...*” Alongside these technical directorates, there  
172   are other structures such as the National Agency for Environmental, Food, Occupational and  
173   Health Product Safety (ANSSEAT), whose mission is just as important in the fight against and  
174   prevention of NCDs in Burkina Faso, but no functional link between the DPCM and ANSSEAT  
175   was noted by the actors interviewed.

176   Figure 2: Adapted organization chart of disease-specific structures and overall health function  
177   structures within Burkina Faso's Ministry of Health.

178           3.2.       Reference documents

179   The document review and interviews conducted indicate the existence of several reference  
180   documents related to the fight and control of food-related NCDs in several different service  
181   directorates. In 2016, the DPCM, which is also the structure in charge of the prevention and  
182   control of NCDs, drew up an integrated strategic plan to combat NCDs (2016 - 2020), budgeted  
183   at 5,469,734,500 FCFA or around 9.8 million dollars (\$). In addition to this integrated strategic  
184   plan, the DPCM has other plans in place, notably (i) the three-year oral health strategic plan,

185 (ii) the strategic action plan to combat cancer, all of which are currently being implemented in  
186 addition to the integrated strategic plan, which expires in 2020. It should be noted that the  
187 integrated strategic plan to combat NCDs has not been evaluated either at mid-term or at the  
188 end of its implementation, although the DPCM has initiated a review of this reference  
189 document. Although all the players interviewed recognize the need to revise the plan to adapt  
190 it to the new requirements in terms of control and fight against NTMs, they are unanimous  
191 (100% of those interviewed) that an evaluation of the current plan should have been carried out  
192 to identify shortcomings and bottlenecks, in order to correct them in the new reference system  
193 currently being drawn up. *“The development of such a document should be based on evidence  
194 and new WHO guidelines unfortunately the implementation of the plan has not been evaluated  
195 to assess the strengths and weaknesses of the current plan prior to the update”*. In addition to  
196 these documents, Burkina Faso has taken a number of measures to combat and control NCDs,  
197 including (i) a smoking ban, (ii) a ban on tobacco advertising, promotion and sponsorship, (iii)  
198 restrictions on the physical availability of alcohol, (iv) an increase in alcohol excise duties, (v)  
199 restrictions on the marketing of breast-milk substitutes, (vi) a strong measure on cancer  
200 treatment.

### 201 3.3. Involving stakeholders in the design process

202 Sixty percent (60%) of those interviewed said they had been involved in drawing up the  
203 integrated plan to combat NCDs. It should be noted that certain technical structures of the  
204 Ministry of Health declared that they had not been involved in drawing up the plan.  
205 Forty percent (40%) appear not to have been involved, especially NGOs/Associations. *“the  
206 drafting of the document was not as participatory; it was mainly Ministry of Health players and  
207 NGOs/Associations working in the field of NCDs that were involved”*, stresses one of the  
208 interviewees”.  
209 *“...other ministerial departments such as agriculture, education, trade, water, hygiene and  
210 sanitation have not been involved in the process, even though they have a role to play, so I don't  
211 think they feel concerned, even though everyone has a role to play”*.

### 212 3.4. Existence of a coordinating body or mechanism

213 All those interviewed (100%) felt that the Ministry of Health was leading the fight against  
214 NCDs in Burkina Faso. Analysis of the actors involved in implementing the integrated strategic  
215 plan to combat NCDs suggests that planning has been multi-sectoral. Of the 32 actors identified,  
216 other ministerial departments other than the Ministry of Health accounted for 28%, the  
217 academic sector (9%), the private sector (6%) and United Nations agencies.  
218 As far as multi-sectoral coordination or coordination mechanisms are concerned, no bodies  
219 have been set up at either sectoral (Ministry of Health) or national level. All of those interviewed  
220 (100%) also deplored the absence of a framework for consultation between these actors to  
221 ensure better coordination of the implementation of these interventions. As one informant put  
222 it: *“the fight against NCDs is multi-sectoral and cannot be dealt with by the health department  
223 alone. The problem is that the roles and responsibilities of each player involved are  
224 inadequately defined... the other aspect is that we don't have a framework for concerted action,  
225 as in the case of the fight against malnutrition”*.

### 226 3.5. Resource availability

227 The interviewees (100%) clearly mentioned the inadequacy of resources allocated to the fight  
228 against NCDs in Burkina Faso, both in the state budget and from technical and financial  
229 partners:  
230 *“...most of the interventions set out in the integrated strategic plan to combat NCDs have not  
231 been implemented, due to insufficient or even non-existent resources to implement them”*,

232 “... it's as if all the efforts of both the state and its partners are directed towards combating  
233 malnutrition, yet the burden of these NCDs is just as real for our populations”.

234 For them, there isn't enough enthusiasm at international level for raising funds to fight NCDs.  
235 In support of this view, one interviewee emphasized: “... for example, every year, Burkina Faso  
236 carries out nutritional surveys with the support of technical and financial partners to assess the  
237 nutritional status of children under 5 years of age. However, in 10 years, Burkina Faso has  
238 only carried out two (2) STEPS surveys, which shows how much interest people have in the  
239 problems of NCDs in our country». The interviewee sees this as a clear indicator of the lack of  
240 commitment and interest in the NCD issue in developing countries in general, and in Burkina  
241 Faso in particular.

### 242 3.6. Identified budget lines

243 A total of twenty-nine (29) budget lines related to the prevention and/or management of NCDs  
244 in Burkina Faso were identified. Following categorization and weighting, three (3) budget lines  
245 were considered “specific” to NCDs, eighteen (18) were “sensitive” and eight (8) were  
246 considered “positive investments” (Table 1).

247 Table I: Selected budget lines

248

| N° | Budget lines                                                                                                                                | Allocation type  | Categorization      |
|----|---------------------------------------------------------------------------------------------------------------------------------------------|------------------|---------------------|
| 1  | Childbirth & Emergency Obstetric Care / Subsidies to other beneficiary categories                                                           | Current transfer | Positive investment |
| 2  | Acquire contraceptive products                                                                                                              | Investment       | Positive investment |
| 3  | Acquire vaccines and consumables                                                                                                            | Investment       | Sensitive           |
| 4  | Acquire micronutrients                                                                                                                      | Investment       | Positive investment |
| 5  | Acquisition of Hospital Equipment / STATE / CHR / Technical equipment-tools                                                                 | Investment       | Positive investment |
| 6  | Support Dialysis Units/Subsidies to other categories of beneficiaries                                                                       | Investment       | Specific            |
| 7  | Ensure the construction and equipment of the Infrastructures of the Bobo-Dioulasso hemodialysis project                                     | Investment       | Sensitive           |
| 8  | Ensure coverage of community-based health workers/Subsidies to other categories of beneficiaries                                            | Current transfer | Sensitive           |
| 9  | Ensure Burkina's commitments to Global Fund financing for the management of certain diseases/Subsidies to other categories of beneficiaries | Current transfer | Sensitive           |
| 10 | Ensure the medical examination of workers                                                                                                   | Current transfer | Sensitive           |
| 11 | National Center for Apparatus and Orthopedics/ Subsidies to other beneficiary categories                                                    | Current transfer | Positive investment |
| 12 | National Center for the Fight against Blindness/ Subsidies to other beneficiary categories                                                  | Current transfer | Sensible            |
| 13 | Build and equip a cancer center in Ouagadougou/Research and development costs                                                               | Investment       | Sensible            |
| 14 | Female Cancer Screening                                                                                                                     | Current transfer | Specific            |
| 15 | Availability of maternal health services / STATE / Eta tranche / Other purchases of goods & services                                        | Investment       | Sensible            |
| 16 | Students in 6th year of Pharmacy / Current transfers to households                                                                          | Current transfer | Sensible            |

| N° | Budget lines                                                                                                                                               | Allocation type  | Categorization      |
|----|------------------------------------------------------------------------------------------------------------------------------------------------------------|------------------|---------------------|
| 17 | End of medical cycle students                                                                                                                              | Current transfer | Sensible            |
| 18 | Free preventive care/Subsidies to other beneficiary categories                                                                                             | Current transfer | Positive investment |
| 19 | Hospital interns/Routine transfers to households                                                                                                           | Current transfer | Sensible            |
| 20 | National Vaccination Days/ Subsidy to public establishments                                                                                                | Current transfer | Sensible            |
| 21 | Tobacco control/Transfers to supranational organizations & government contribution                                                                         | Current transfer | Specific            |
| 22 | Doctors in specialization/Routine transfers to households                                                                                                  | Current transfer | Sensible            |
| 23 | Standardization of health facilities / STATE / Standardization                                                                                             | Investment       | Positive investment |
| 24 | Workers' Health Office/subsidies to other beneficiary categories                                                                                           | Current transfer | Sensible            |
| 25 | Pay Burkina's contribution to the World Health Organization                                                                                                | Current transfer | Sensible            |
| 26 | Pay Burkina's contribution to the West African Health Organization/Transfers to supranational authorities and contributions to international organizations | Current transfer | Sensible            |
| 27 | Support the construction of the Tengandogo radiotherapy center                                                                                             | Investment       | Sensible            |
| 28 | Social programs / STATE / Dialysis unit / Other purchases of goods & services                                                                              | Investment       | Sensible            |
| 29 | Care for children aged 0 to 5/Subsidies to other beneficiary categories                                                                                    | Current transfer | Positive investment |

### 249 3.7. Budget allocations and expenditure

250 Over the period 2010 to 2020, the Burkina Faso Ministry of Health allocated nearly 17.33  
251 billion FCFA (US\$29.9 million), or an average of US\$2.72 million per year, to the fight against  
252 NCDs. This allocation represents around 1.55% of the total budget of the Ministry of Health  
253 over the same period. The budget absorption rate, defined as the percentage of the allocated  
254 budget actually used, was over 98% (Table 2). With this high absorption rate, we carried out  
255 the analyses with budget allocations only.

256 Table II: Budget allocations and expenditure related to NCDs of the Ministry in charge of  
257 Health from 2010-2020

| Year (2010 – 2020)                            | Total                         | Yearly average  |
|-----------------------------------------------|-------------------------------|-----------------|
| Total Budget allocations for NCDs (FCFA)      | 29 885 033,32 <sup>1</sup> \$ | 2 716 821 \$    |
| Total Expenses for NCDs (FCFA)                | 29 459 619,47 \$              | 2 678 147,22 \$ |
| Absorption rate (expenses / allocations in %) | 98,58%                        | 98,58%          |

259

<sup>1</sup> 1 dollar US = 580 FCFA

### 260 3.8. Allocation by intervention type

261 Of this budget of 17.33 billion FCFA (\$29.8 million), 6.64 billion or 38.4% was allocated to  
262 “specific NTM” interventions, while 10.68 billion or 61.6% was allocated to “sensitive”  
263 interventions.

### 264 3.9. Budget allocation by objectives of the global action plan

265 Analysis of the budget according to the objectives of the WHO global action plan to combat  
266 NCDs 2013-2020 suggests that only interventions aimed at achieving 3 of the 6 WHO  
267 objectives, namely objectives 3, 4 and 5, received a budget allocation. Goal 4, aimed at  
268 strengthening and orienting health systems, received the largest share of the allocation, i.e. 13.6  
269 billion or 78.48% of total funding. Objective 5, which aims to promote and strengthen national  
270 capacity to carry out actions to prevent and combat NCDs, was the second most financed with  
271 2.08 billion, or around 12%, and finally objective 3, which aims to reduce exposure to  
272 modifiable risk factors, received 1.64 billion, or 9.5%.

273 The objectives of the action plan that received no budgetary allocation include Objective 1  
274 “Give greater priority to the fight against NCDs in global, regional and national agendas and in  
275 internationally agreed development goals, by strengthening international cooperation and  
276 awareness”, Goal 2 “Strengthen national capacity, leadership, governance, multisectoral action  
277 and partnerships to accelerate action on NCDs in countries” and Goal 6 “Monitor trends and  
278 determinants of NCDs and assess progress in prevention and control”.

### 279 3.10. Evolution of budget allocations from 2010 – 2020

280 Trend analysis of allocations shows an upward trend in annual allocations from 365 million in  
281 2010 to over 5 billion in 2017, with a rollercoaster ride between 2010 and 2013 (Figure 3).  
282 Allocations then underwent a drastic reduction of over 62%, from 5.019 billion in 2017 to 1.877  
283 billion in 2020, virtually their 2016 value.

284 Figure 3: Evolution of budget allocations from 2010 – 2020

285

### 286 3.11. Allocations before and after the development of the integrated strategic plan for 287 the fight against NCDs 2016-2020

288 In 2015, the Ministry of Health drew up an integrated national strategic plan to combat NCDs  
289 2016-2020. Immediately after the adoption of this integrated strategic plan, the annual budget  
290 dedicated to NCDs more than doubled, from 807 million CFA francs in 2015 to 1.87 billion  
291 CFA francs in 2020 (Figure 4). Funding peaked at 5.019 billion in 2017, representing a 522%  
292 increase on 2015, the year before the National Strategic Plan 2016-2020 came into force.

293 A comparison of average annual budget allocations before (2010-2015) and after (2016-2020)  
294 the development of the strategic plan (Figure 4) shows that, overall, budget allocations  
295 improved after the strategic plan was developed. Indeed, the average annual allocation  
296 increased significantly ( $p=0.02$ ) from around 467.4 million before the adoption of the strategic  
297 plan to over 2.9 billion FCFA afterwards.

298 Figure 4: Comparison of average allocations before and after the strategic plan

## 299 4. Discussions

300 This study provides an answer to one of the concerns raised by Ouedraogo et al, [14] about  
301 institutional arrangements and budget allocations for the prevention and control of NCDs in  
302 Burkina Faso.

303 Burkina Faso has drawn up a number of reference documents relating to the fight against  
304 NCDs, notably the integrated plan to combat NCDs (2016-2020). This document was drawn up  
305 at the level of the Ministry of Health and did not take sufficient account of other ministerial  
306 departments, notably agriculture, education, water, hygiene and sanitation, and the private



307 sector, despite the fact that the multi-sectoral nature of the fight against food-related NCDs has  
308 been documented by several authors [24, 25]. In Morocco and Algeria, for example, the title of  
309 the reference document is very evocative. Indeed, Morocco has a national multisectoral strategy  
310 for the prevention and control of non-communicable diseases and Algeria has a national  
311 multisectoral strategic plan for the integrated fight against the risk factors of non-communicable  
312 diseases [26, 27]. Ghana has a national policy for the prevention and control of NCDs (Ghana  
313 NCD Policy 2014) [28]. Such reference documents developed in a multi-sectoral dynamic with  
314 a national character allow for commitment at the highest level and better advocacy for the  
315 mobilization of resources [29, 30] and helps create an environment conducive to the adoption  
316 of healthy behaviors [31]. It is therefore essential that Burkina Faso equips itself as soon as  
317 possible with a multisectoral policy or plan to combat and control NCDs; moreover, the WHO  
318 estimates that Burkina Faso does not have any documents on this subject [9].

319 No consultation framework or common results framework that could enable  
320 multisectoral action and coordination is available in Burkina Faso for the fight against NCDs,  
321 yet this step is a necessity for optimal programming and implementation of interventions with  
322 a guarantee of accountability of the actors involved [24, 25, 32]. This situation is not typical of  
323 Burkina Faso in the ECOWAS region; Ghana, for example, which has had initiatives to combat  
324 NCDs since the 1990s with a national policy to combat NCDs, has not succeeded in establishing  
325 an effective multi-sectoral consultation framework [28]. The implementation of such a  
326 framework allows in some cases better monitoring and better synergy of action of the partners  
327 around the priorities. Some countries seem to have been able to set up this framework of  
328 consultation like Morocco for example. This is probably due to the fact that the development  
329 of the document was participatory and multisectoral from the base. This provision facilitates  
330 multisectoral coordination and allows better mobilization of financial and human resources for  
331 the implementation of the policy [6, 30, 33].

332 The absence of multi-sectoral programming and a multi-sectoral consultation body as  
333 observed in Burkina Faso leads to an overlap of numerous functions making the mobilization  
334 of resources ineffective [34] in a context where international development aid to meet this  
335 burden remains negligible [35]. This observation was clearly made by key informants who  
336 unanimously stated that there is an insufficiency of resources allocated to the issue of NCDs in  
337 Burkina Faso. They even believe that NCDs do not seem to be a priority for either the state or  
338 partners in terms of the resources allocated to the issue. The budget analysis carried out showed  
339 that during the period 2010-2020, the Ministry of Health of Burkina Faso allocated only 1.5%  
340 of its sectoral budget to the fight against NCDs in Burkina Faso, i.e. approximately 17.33 billion  
341 FCFA (29.9 million US dollars), thus justifying the statements of the interviewees.  
342 WHO estimates that annual investment in NCD interventions ranges from less than US\$1 per  
343 person in low-income countries to US\$3 per person in upper-middle-income countries [36].  
344 The most effective NCD interventions for individuals cost US\$11.4 billion per year for all low-  
345 and middle-income countries [36]. Although we are unable to clearly establish the impact of  
346 Burkina Faso's integrated plan on the increase in allocations observed after the adoption of the  
347 plan in 2015, the process of developing the plan has enabled us to better understand the problem,  
348 to properly structure and quantify the response, and therefore to clarify investment opportunities  
349 [4, 24, 37]. The plan highlighted, for example, the importance of “female cancer screening,”  
350 which is considered one of the most cost-effective interventions in the fight against NCDs, with  
351 a cost-effectiveness ratio of  $\leq$  \$1 according to WHO [22]. The inadequate allocation of  
352 resources to combat and control NCDs has been documented by the Ghana Noncommunicable  
353 Diseases Alliance which identified funding as a major challenge but acknowledged that data on  
354 budget allocations for NCDs in Ghana are unavailable. It is clear that there is a lack of resources  
355 allocated to combat NCDs yet low and middle income countries like Burkina Faso can gain  
356 \$350 billion by 2030 by increasing investments in NCD prevention and treatment [38].

357 According to WHO, for every dollar invested in scaling up NCD response in these countries,  
358 society will see a return of at least \$7 in increased employment, productivity and longer lives  
359 [38]. Burkina Faso would therefore benefit from investing significantly in the fight against  
360 NCDs in view of the ever-increasing burden of these diseases.

361 To our knowledge, this is the only study in Burkina Faso that has provided some answers  
362 to questions about the institutional environment and budgetary allocations intended for the fight  
363 against NCDs despite the methodological limitations, namely (i) the insufficiency in taking into  
364 account the reference documents of other ministerial departments; (ii) institutional changes in  
365 Burkina Faso have led to several changes at the head of state structures, which could impact the  
366 responses of interviewees depending on their seniority at the head of the structure; (iii) the  
367 consideration only of state allocations in the analysis due to the difficulty of obtaining accurate  
368 data on funding from technical and financial partners, (iv) the absence of a common  
369 multisectoral results framework listing consensual interventions for the fight against NCDs in  
370 Burkina Faso, which makes financial monitoring difficult in other contributing sectors.

## 371 5. Conclusion

372 The analysis of the institutional framework and budget allocations for the fight and control of  
373 NCDs reveals many difficulties in the institutional system in Burkina Faso. The prevention and  
374 control of NCDs must be considered as a system in which appropriate and sustainable  
375 investment is required. The analysis shows many difficulties hampering the performance of the  
376 fight and control of NCDs in Burkina Faso, including (i) the absence of an accurate estimate of  
377 the burden of NCDs, (ii) the absence of a multisectoral policy or strategic plan involving all  
378 stakeholders, (iii) the absence of a multisectoral coordination body, (iii) the insufficiency of  
379 sufficient financial resources, (iv) the insufficiency of research on the problem of NCDs.  
380 Although the institutional framework for combating NCDs in Burkina Faso has shortcomings,  
381 it must be recognized that Burkina Faso has made some progress in the fight against NCDs with  
382 numerous texts and laws aimed at reducing exposure to modifiable risk factors for non-  
383 communicable diseases and the underlying social determinants. In addition, many specific and  
384 sensitive budget lines for the fight and control of NCDs have been identified in the Burkinabe  
385 state budget despite the difficult security and humanitarian situation that the country has been  
386 going through since 2018, thus indicating political will and a favorable environment in a context  
387 marked by the scarcity of resources. Much work remains to be done when we know that the  
388 scale of the burden of NCDs is high and increasing in low- and middle-income countries such  
389 as Burkina Faso.

## 390 6. Author Contributions

391 Conceptualization: Moussa Ouedraogo, Dia Sanou, Aly Savadogo

392 Investigation: Moussa Ouedraogo, Dia Sanou, Mahamadé Goubgou

393 Formal analysis: Moussa Ouedraogo, Mahamadé Goubgou

394 Methodology: Moussa Ouedraogo, Mahamadé Goubgou, Tirogo Souleymane, Estelle Aissa  
395 Bambara, Aly Savadogo.

396 Validation: Moussa Ouedraogo, Mahamadé Goubgou, Tirogo Souleymane, Estelle Aissa  
397 Bambara, Aly Savadogo.

398 Writing– original draft: Moussa Ouedraogo.

399 Writing– review & editing: Moussa Ouedraogo, Mahamadé Goubgou, Tirogo Souleymane,  
400 Estelle Aissa Bambara, Aly Savadogo.

## 401 7. Acknowledgments

402 The authors express sincere gratitude to all health agencies, study participants and research  
403 assistants who supported us through the data collection period.

404 8. References

- 405 1. Mendis S, Chestnov O. Costs, benefits, and effectiveness of interventions for the  
406 prevention, treatment, and control of cardiovascular diseases and diabetes in Africa. *Progress*  
407 *in cardiovascular diseases*. 2013;56(3):314-21.
- 408 2. Bernard M, Sandrine L, Agnès G, Francis D. Transition nutritionnelle et maladies  
409 chroniques non transmissibles liées à l'alimentation dans les pays en développement. *Cahiers*  
410 *d'études et de recherches francophones / Santé*. 2002;12(1):45-55.
- 411 3. Global Panel. Global panel on agriculture and food systems for nutrition: food systems  
412 and diets: facing the challenges of the 21st century: London, UK, 2016 (ISBN 978-0-9956228-  
413 0-7), 132pp. <http://glopan.org/sites/default/files/ForesightReport.pdf>. *Food Security*. 2017;9.  
414 doi: 10.1007/s12571-017-0678-y.
- 415 4. OMS. Preventing chronic diseases: a vital investment: WHO global report: World  
416 Health Organization; 2005.
- 417 5. OMS. The global burden of disease: 2004 update: World Health Organization; 2008.
- 418 6. Ouedraogo M, Sanou D, Kere IWZ, Sankara S, Thiombiano-Coulibaly N, Ouedraogo  
419 O, et al. Sahel terrorist crisis and development priorities: case of financial allocations for the  
420 control of non-communicable diseases in Burkina Faso. *Frontiers in public health*. 2023;11.
- 421 7. Faso MdlsdB. rapport de l'enquête nationale sur la prévalence des principaux facteurs  
422 de risque communs aux maladies non transmissibles (STEPS 2013). 2013.
- 423 8. Faso MdlsdB. rapport de l'enquête nationale sur la prévalence des principaux facteurs  
424 de risque communs aux maladies non transmissibles (STEPS 2021). 2021.
- 425 9. mondiale de la Santé O. Suivi des progrès dans la lutte contre les maladies non  
426 transmissibles 2020. 2020.
- 427 10. Organization WH. Global action plan for the prevention and control of  
428 noncommunicable diseases 2013-2020: World Health Organization; 2013.
- 429 11. UN. Déclaration politique de la Réunion de haut niveau de l'Assemblée générale sur la  
430 prévention et la maîtrise des maladies non transmissibles. Assemblée Générale 2011 Contract  
431 No.: A/66/L.1.
- 432 12. OMS. Projet de plan d'action pour la lutte contre les maladies non transmissibles 2013-  
433 2020: Rapport du Secrétariat. 2013.
- 434 13. Alwan A. Global status report on noncommunicable diseases 2010. *Global status report*  
435 *on noncommunicable diseases 2010*. 2011.
- 436 14. Ouedraogo M, Sanou DO, O; Zongo, U; , Hama-Ba F, Savadogo A. An overview of  
437 Governance of noncommunicable diseases (NCDs) in West African countries. *Pan African*  
438 *Medical Journal*. 2023;2023; 44:203. doi: <https://doi.org/10.11604/pamj.2023.44.203.36175>.
- 439 15. Atun R, Davies JI, Gale EA, Bärnighausen T, Beran D, Kengne AP, et al. Diabetes in  
440 sub-Saharan Africa: from clinical care to health policy. *The lancet Diabetes & endocrinology*.  
441 2017;5(8):622-67.
- 442 16. Curbing N. Noncommunicable diseases in africa: youth are key to curbing the epidemic  
443 and achieving sustainable development. Washington: Population Reference Bureau. 2015.
- 444 17. Guillemette F. L'approche de la Grounded Theory; pour innover? *Recherches*  
445 *Qualitatives*. 2006;26.
- 446 18. Halcomb EJ, Hickman L. Mixed methods research. 2015.
- 447 19. SUN. Investigating Nutrition in National Budgets: Budget Analysis for  
448 Nutrition. . 2015.
- 449 20. Aho A KJ, Siri A, Tou Nana A, Gueye IN, Ndiaye S, Nébié G, Touré F, Faye Malick,  
450 Diouf A, Zagré NM. Consultation ouest africaine sur la méthodologie de suivi du financement  
451 de la nutrition. Bureau régional de l'UNICEF pour l'Afrique de l'Ouest et du Centre, Bureau  
452 régional de Action Contre la Faim pour l'Afrique de l'Ouest, 2018 2018. Report No.

- 453 21. Ministère de la santé. Plan stratégique intégré de la lutte contre les maladies non  
454 transmissibles 2016 - 2020. 2016. p. 67.
- 455 22. WHO. Combattre les MNT:«meilleurs choix» et autres interventions recommandées  
456 pour lutter contre les maladies non transmissibles. Organisation mondiale de la Santé, 2017.
- 457 23. MSHP. Politique nationale multisectorielle de nutrition 2020 - 2029. In: STAN, editor.  
458 <https://www.cartographie-projets.sante.gov.bf/public/documents/1665618003.pdf>;  
459 Gouvernement; 2020. p. 90.
- 460 24. OMS. Global action plan for the prevention and control of noncommunicable diseases  
461 2013-2020: World Health Organization; 2013.
- 462 25. OMS. Approaches to establishing country-level multisectoral coordination mechanisms  
463 for the prevention and control of noncommunicable diseases. 2015.
- 464 26. CHAHBOUNE M, Elkhoudri N, Chebabe M, Benmoussa A, Tachfouti N. Estimation  
465 du risque cardiovasculaire chez les consultants aux établissements des soins de santé primaire  
466 à la ville de Settat, Maroc. *Revue marocaine de santé publique*. 2019;6(9).
- 467 27. MS. Stratégie Nationale Multisectorielle de Prévention et de Contrôle des Maladies Non  
468 Transmissibles 2019 - 2029. In: santé Mdl, editor. 2019. p. 44.
- 469 28. Bosu W. A comprehensive review of the policy and programmatic response to chronic  
470 non-communicable disease in Ghana. *Ghana medical journal*. 2012;46(2):69-78.
- 471 29. Ouedraogo M, Sanou D, Kere IWZ, Sankara S, Thiombiano-Coulilyaly N, Ouedraogo  
472 O, et al. Sahel terrorist crisis and development priorities: case of financial allocations for the  
473 control of non-communicable diseases in Burkina Faso. *Frontiers in public health*.  
474 2023;11:1253123.
- 475 30. Ouedraogo O, Doudou MH, Drabo KM, Garnier D, Zagré NM, Sanou D, et al. Policy  
476 overview of the multisectoral nutrition planning process: The progress, challenges, and lessons  
477 learned from Burkina Faso. *The International Journal of Health Planning and Management*.  
478 2020;35(1):120-39.
- 479 31. Mendis S. The policy agenda for prevention and control of non-communicable diseases.  
480 *British Medical Bulletin*. 2010;96(1):23-43. doi: 10.1093/bmb/ldq037.
- 481 32. Irvine L, Elliott L, Wallace H, Crombie IK. A review of major influences on current  
482 public health policy in developed countries in the second half of the 20th century. *The journal*  
483 *of the Royal Society for the Promotion of Health*. 2006;126(2):73-8.
- 484 33. Ousmane O, Maimouna H, Koiné M, Denis G, Noel M, Kristina R, et al. Planning  
485 Capacity, Determinants, and Challenges of Integrating Multisectoral Nutrition into Communal  
486 Development Plans in Burkina Faso. . *Science Journal of Public Health*. 2019;Vol. 7, No. 3,  
487 2019:74-82. doi: 10.11648/j.sjph.20190703.12.
- 488 34. Rani M, Nusrat S, Hawken LH. A qualitative study of governance of evolving response  
489 to non-communicable diseases in low-and middle- income countries: current status, risks and  
490 options. *BMC Public Health*. 2012;12(1):877. doi: 10.1186/1471-2458-12-877.
- 491 35. Shanthi M, Tim Armstrong, Douglas Bettcher, Francesco Branca, Jeremy Lauer, Cecile  
492 Mace, Vladimir Poznyak, Leanne Riley, Vera Da Costa E Silva, Gretchen Stevens. Rapport sur  
493 la situation mondiale des maladies non transmissibles. OMS, 2014.
- 494 36. mondiale de la Santé O. Maladies non transmissibles: ce que les ministères de la finance  
495 et de la fiscalité doivent savoir: note d'information pour le secteur des finances et de la fiscalité.  
496 Organisation mondiale de la Santé, 2016.
- 497 37. Shilton T, Robertson G. Battre les maladies non transmissibles de manière équitable–  
498 soyons sérieux. SAGE Publications Sage UK: London, England; 2018. p. 78-80.
- 499 38. Bettcher D, Krug E. Saving lives, spending less: a strategic response to  
500 noncommunicable diseases. Geneva: World Health Organization. 2018:1-37.
- 501

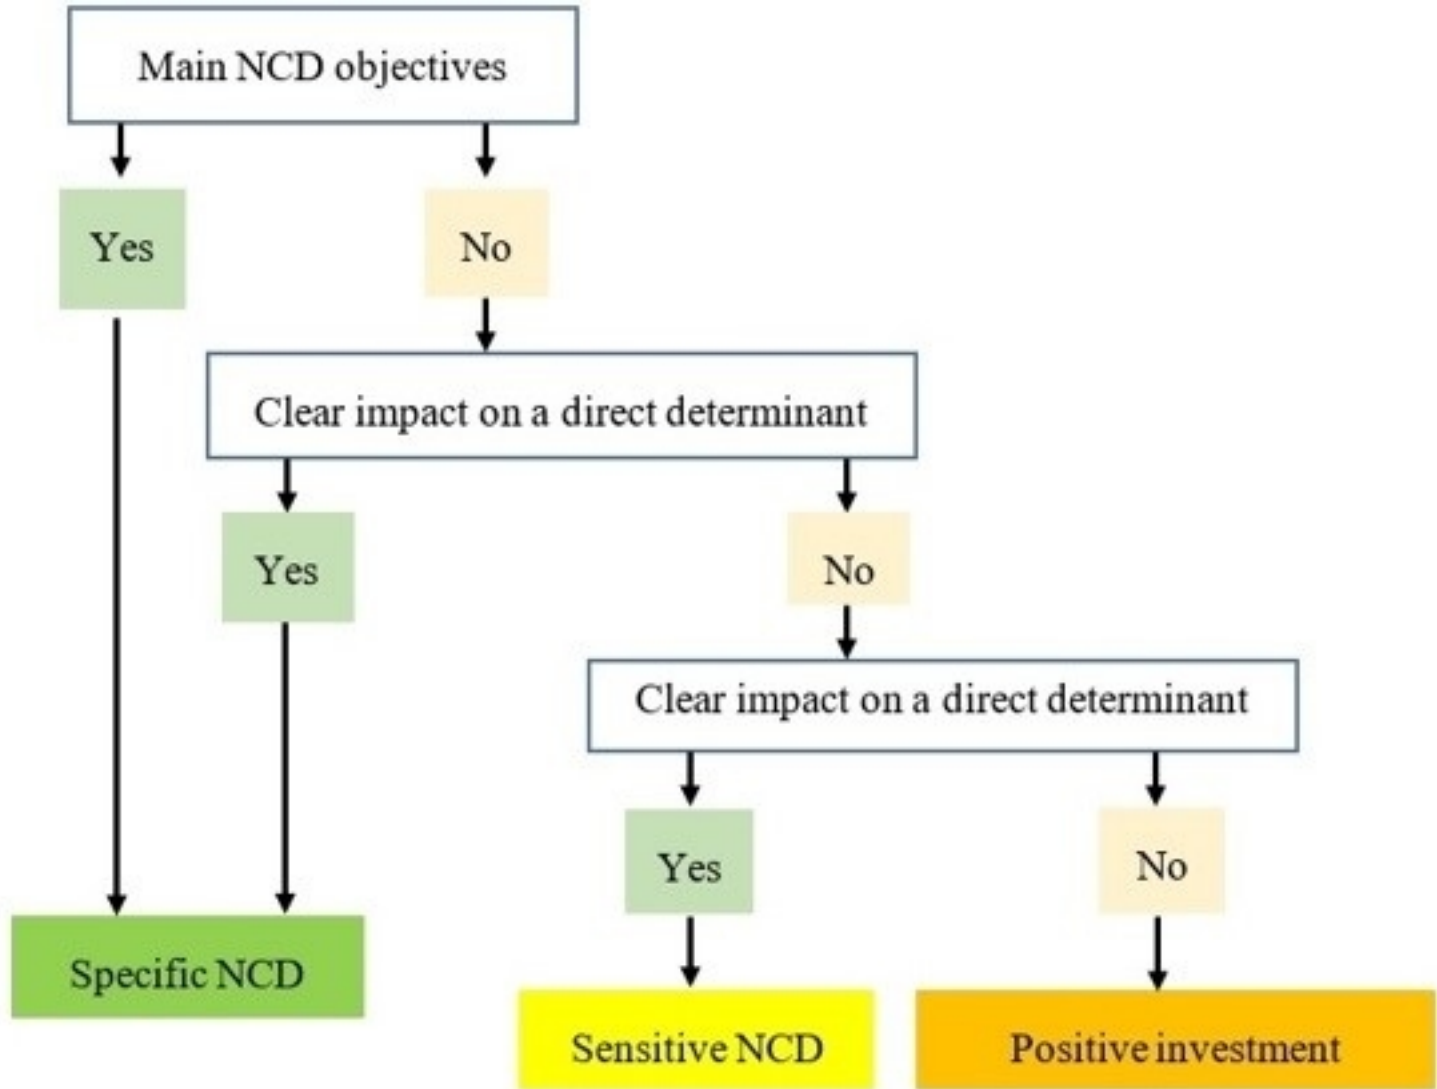

Conceptual framework for categorizing pro-NCD investments

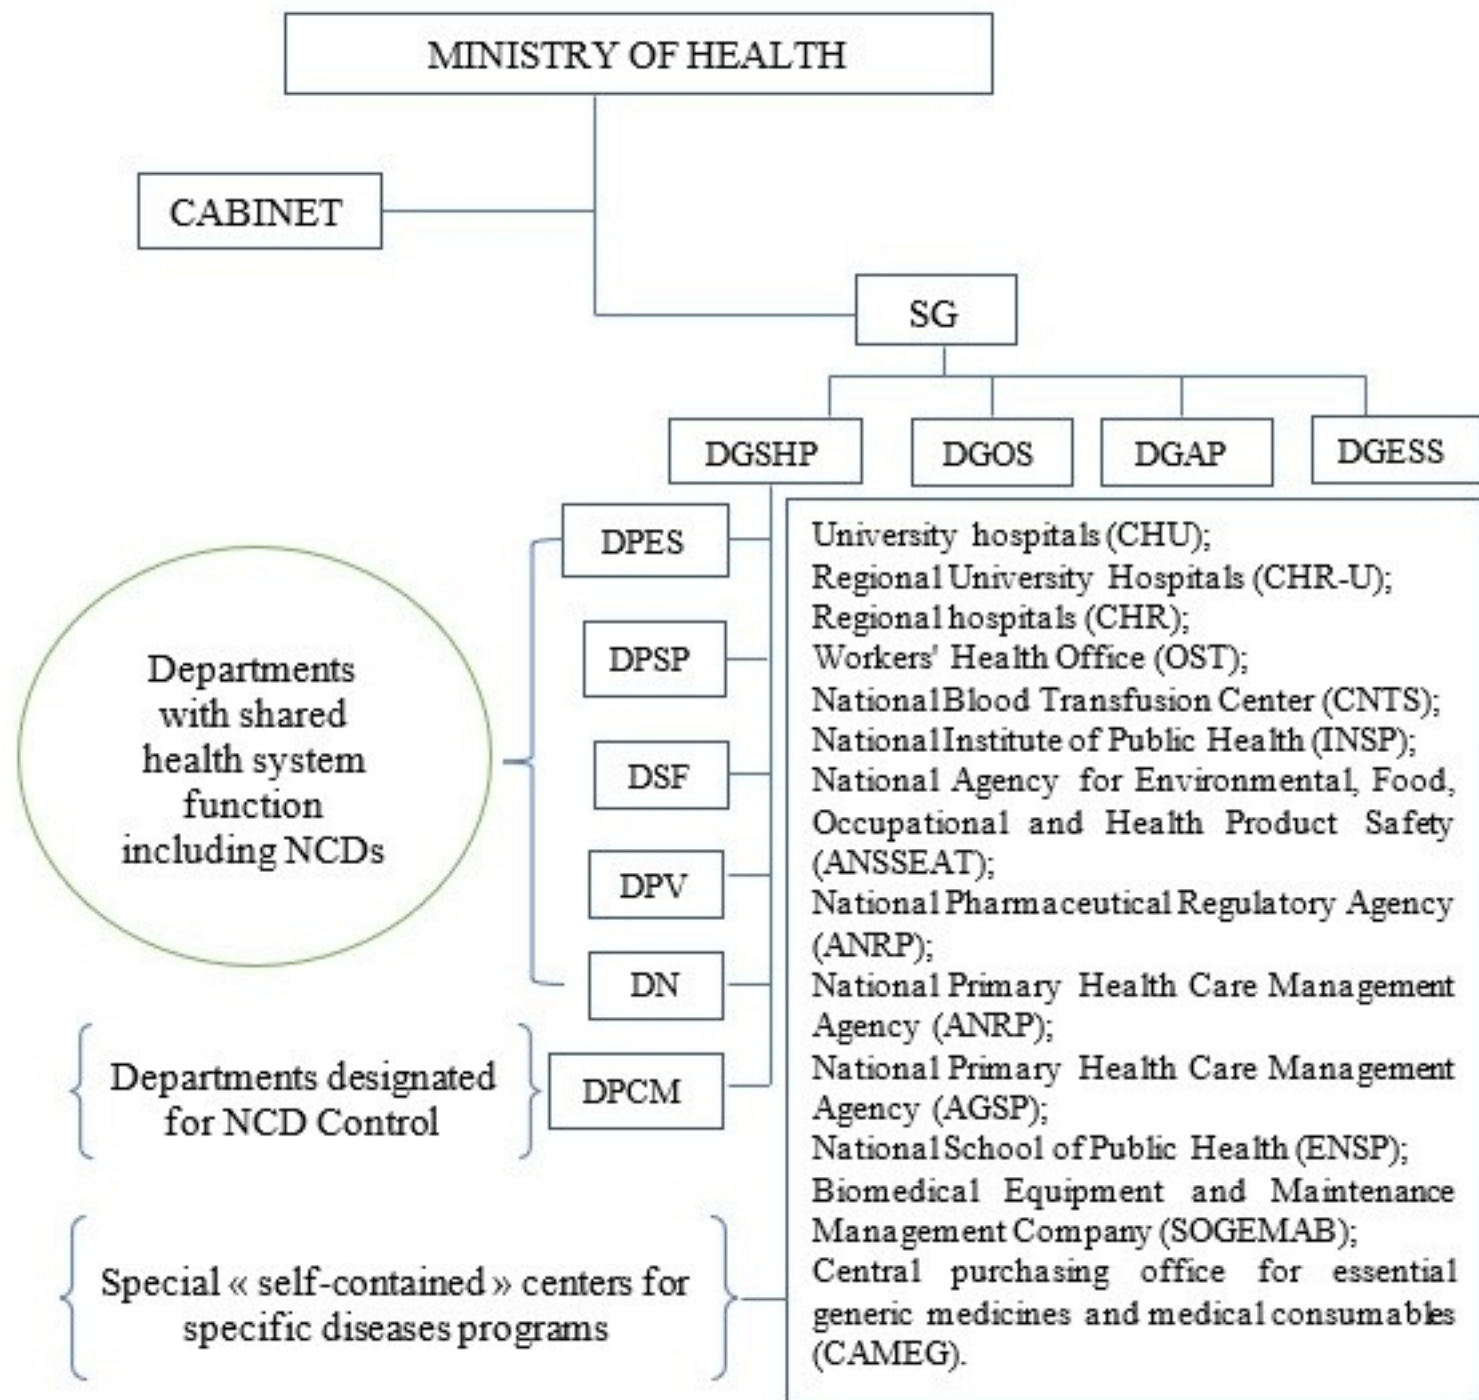

Adapted organization chart of disease-specific

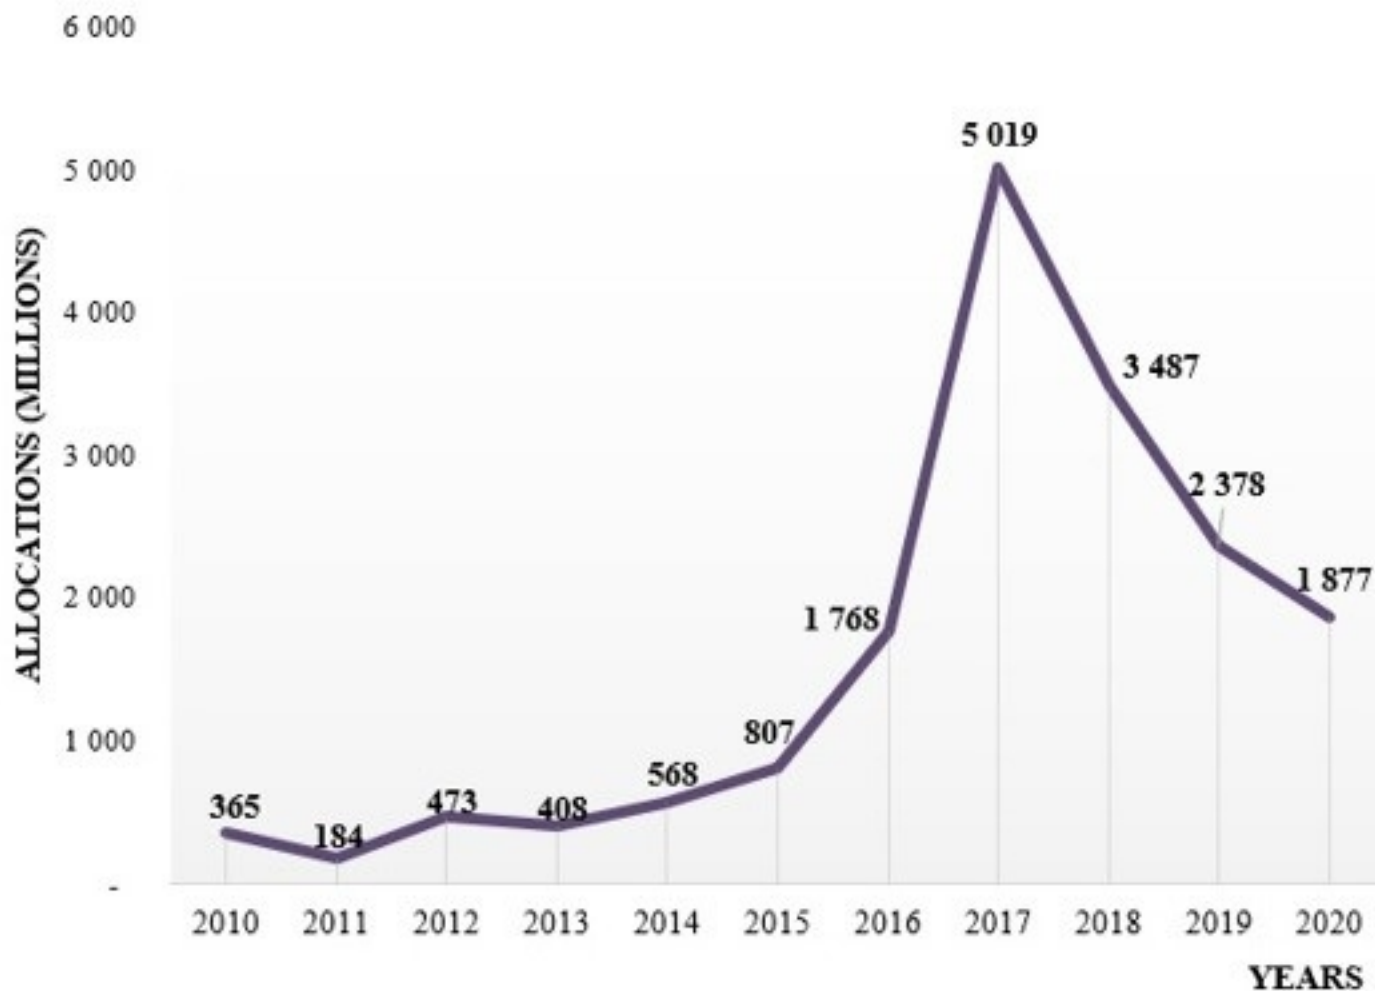

Evolution of budget allocations from 2010

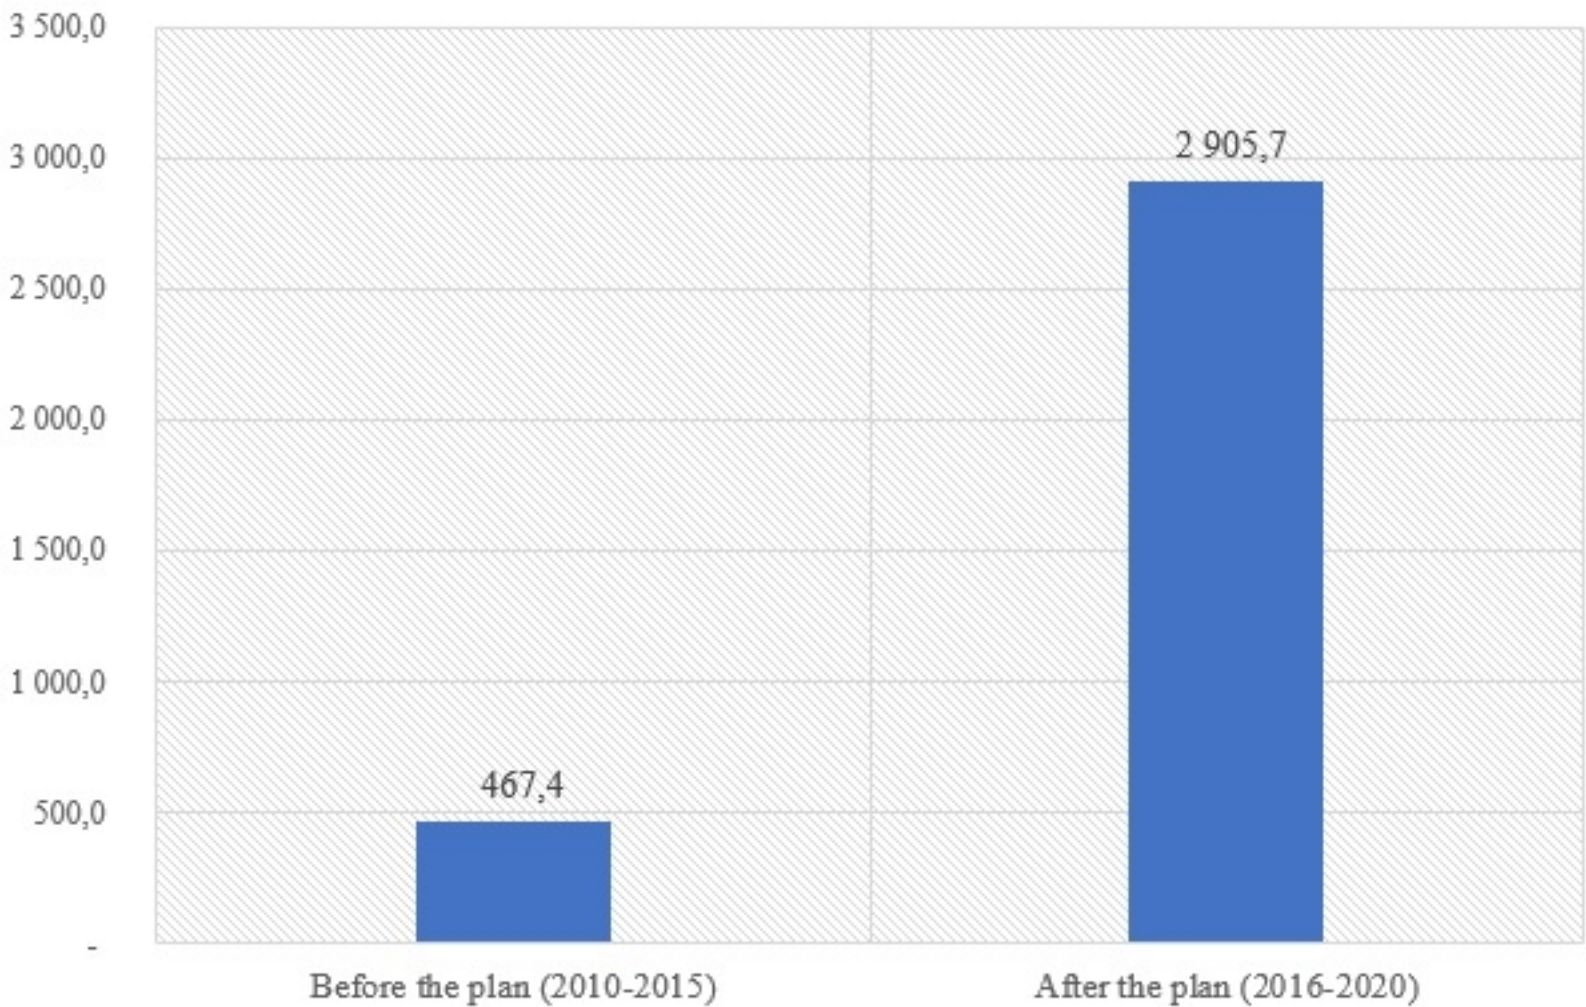

Comparison of average allocations before a
